# Supplementary material for: Limiting factors in single particle cryo electron tomography
Source: PubMed Central journal article supplement (PMC3962116; doi:10.5936/csbj.201207002), 2012-07-01
Supplement: CSBJ-1-e201207002_SM0001.pdf [file CSBJ-1-e201207002_SM0001.pdf]

**Limiting factors in single particle cryo electron tomography.**

Mikhail Kudryashev, Daniel Castaño-Díez and Henning Stahlberg

**Supplemental Material**

| Protein complex                                     | Origin                                                           | Reference | Publication Year | N part | Under-focus [μm] | Resolution [nm] | Pixel size [nm] | Classes | Symmetry                | Ice thickness [nm] | mag [x1000] | Camera [pixels] | Accelerating voltage [keV] | Energy filter used? | Angular coverage [deg] | Total electron dose [e/Å <sup>2</sup> ] | Largest linear size [nm] | Dualt used? | Data processing software |
|-----------------------------------------------------|------------------------------------------------------------------|-----------|------------------|--------|------------------|-----------------|-----------------|---------|-------------------------|--------------------|-------------|-----------------|----------------------------|---------------------|------------------------|-----------------------------------------|--------------------------|-------------|--------------------------|
| Bacterial flagellar motor                           | <i>Borrelia burgdorferi</i> , flgJ <sup>Bb</sup> deletion mutant | [1]       | 2012             | 321    | 4 to 6           | 3.5             | 0.22            | 1       | 1                       | 300                | 31          | 4096            | 300                        | no                  | 128                    | 100                                     | 100                      | no          | [2]                      |
| Basal body triplet                                  |                                                                  | [3]       | 2012             | 1644   | 9 to 24#         | 33              | 6.5             | 1       | 1                       | 300                | 34          | 2048            | 300                        | yes                 | 120                    | 80                                      | 39                       | no          | [4,5]                    |
| Ebola Virus capsid                                  |                                                                  | [6]       | 2012             |        | 6 to 8           |                 |                 | 1       | 1                       |                    | 25 to 50    |                 | 300                        |                     | 120                    | 60                                      |                          | no          | ARGOS                    |
| Marburg Virus                                       |                                                                  | [7]       | 2011             | 68     |                  | 2.6             | 0.49            | 3       | 1                       | 100                | 27.5        | 2048            | 300                        | yes                 | 120                    | 100                                     | 77                       | no          | [8]                      |
| Bacterial flagellar motor                           | <i>Borrelia burgdorferi</i>                                      | [9]       | 2012             | 138    | 10               | 4.6             | 0.82            | 2       | c16                     | 300                |             | 2048            | 300                        | yes                 | 120                    | 200                                     | 100                      | no          | [9]                      |
| Influenza virus                                     |                                                                  | [10]      | 2012             |        | 4                | 2.5             | 0.78            |         | c3                      |                    |             | 2048            | 120                        | yes                 | 132                    | 70                                      | 35                       | no          | [11] and [12]            |
| Inner dynein arms and inter-doublet links in        | mouse respiratory cilia                                          | [13]      | 2012             | 45     | 4 to 4.5         |                 |                 | 1       | 1                       |                    | 27          | 2048            | 200                        | yes                 | 120                    |                                         | 96                       | no          | [12] and [5]             |
| Flagellum                                           | <i>Trypanosoma brucei</i>                                        | [14]      | 2011             |        | 6 to 10          |                 |                 | 1       | C1, longitudinal repeat | 300                | 11 to 16    | 4096            | 200                        | yes                 | 120                    | 60-74                                   | 96                       | no          | [15]                     |
| Actin-myosin contacts in muscle, freeze substituted |                                                                  | [16]      | 2010             | 515    |                  | 3.5             | 0.69            | 7       | C1, longitudinal repeat | 50                 |             | 2048            | 300                        | no                  | 144                    | 420                                     | 39                       | yes         | [2]                      |
| Bacterial flagellar motors                          | <i>A. longum</i>                                                 | [17]      | 2011             | 35     | 8 to 12          | 8.4             | 1.9             | 1       | C16                     |                    |             | 2048            | 300                        | yes                 | 120                    | 200                                     | 100                      | part.       | [12] and [18]            |
|                                                     | <i>B. burgdorferi</i>                                            |           | 2011             | 43     | 8 to 12          | 5               | 1.3             | 1       | C16                     | 300                |             | 2048            | 300                        | yes                 | 120                    | 200                                     | 100                      | part.       |                          |
|                                                     | <i>T. primitia</i>                                               |           | 2006             | 20     | 10 to 18         | 7.7             | 1.9             | 1       | C16                     | 300                |             | 2048            | 300                        | yes                 | 120                    | 200                                     | 100                      | part.       |                          |
|                                                     | <i>H. hepaticus</i>                                              |           | 2011             | 60     | 8 to 12          | 5               | 1.3             | 1       | C13                     |                    |             | 2048            | 300                        | yes                 | 120                    | 200                                     | 100                      | part.       |                          |
|                                                     | <i>C. jejuni</i>                                                 |           | 2011             | 15     | 8 to 12          | 6.4             | 1.9             | 1       |                         |                    |             | 2048            | 300                        | yes                 | 120                    | 200                                     | 100                      | part.       |                          |
|                                                     | <i>H. gracilis</i>                                               |           | 2011             | 94     | 8 to 12          | 5.9             | 1.3             | 1       |                         |                    |             | 2048            | 300                        | yes                 | 120                    | 200                                     | 100                      | part.       |                          |
|                                                     | <i>V. cholerae</i>                                               |           | 2011             | 16     | 8 to 12          | 8.3             | 1.9             | 1       |                         |                    |             | 2048            | 300                        | yes                 | 120                    | 200                                     | 100                      | part.       |                          |
|                                                     | <i>S. enterica</i>                                               |           | 2011             | 83     | 8 to 12          | 4.8             | 1.3             | 1       |                         | 600                |             | 2048            | 300                        | yes                 | 120                    | 200                                     | 100                      | part.       |                          |
|                                                     | <i>E. coli</i>                                                   |           | 2011             | 46     | 8 to 12          | 5.9             | 1.3             | 1       |                         | 600                |             | 2048            | 300                        | yes                 | 120                    | 200                                     | 100                      | part.       |                          |
|                                                     | <i>C. crescentus</i>                                             |           | 2011             | 30     | 8 to 12          | 5.9             | 1.3             | 1       |                         | 400                |             | 2048            | 300                        | yes                 | 120                    | 200                                     | 100                      | part.       |                          |
| <i>H. neptunium</i>                                 | 2011                                                             | 27        | 8 to 12          | 6.8    | 1.5              | 1               |                 |         |                         | 2048               | 300         | yes             | 120                        | 200                 | 100                    | part.                                   |                          |             |                          |
| Radial spokes                                       | <i>Chlamydomonas flagella</i>                                    | [19]      | 2011             |        | 6 to 8           | 3.3             | 1               | 1       | C1, longitudinal repeat | 350                |             | 2048            | 300                        | yes                 | 130                    | 100                                     | 96                       | no          |                          |
| Procapsid possible packaging intermediates          | Bacteriophage φ6                                                 | [20]      | 2011             | 120    | 4                | 4.4             | 0.78            | 4       | C5                      | 50                 | 22          |                 | 120                        | yes                 | 132                    | 70                                      | 50                       | no          | [12]                     |

| Protein complex                        | Origin                                                  | Reference | Publication Year | N part   | Under-focus [μm]     | Resolution [nm] | Pixel size [nm] | Classes | Symmetry                | Ice thickness [nm] | mag [x1000] | Camera [pixels] | Accelerating voltage [keV] | Energy filter used? | Angular coverage [deg] | Total electron dose [e/Å <sup>2</sup> ] | Largest linear size [nm] | Dual tilt used? | Data processing software |
|----------------------------------------|---------------------------------------------------------|-----------|------------------|----------|----------------------|-----------------|-----------------|---------|-------------------------|--------------------|-------------|-----------------|----------------------------|---------------------|------------------------|-----------------------------------------|--------------------------|-----------------|--------------------------|
| DNA ejection machinery                 | <i>Bacillus anthracis, phage 8a</i>                     | [21]      | 2011             | 2518     | 4 to 6               | 3.6             | 0.39            | 4       | 5 and 6                 | 100                |             | 4096            | 300                        | no                  | 128                    | 100                                     | 200                      | no              | [2]                      |
| Envelope Glycoproteins                 | Trimeric Simian Immunodeficiency Virus                  | [22]      | 2011             | 900-4800 | 2.5                  | 2.5             | 0.41            | 10      | C3                      | 100                | 34          | 2048            | 200                        | yes                 | 125                    | 90                                      | 41                       | no              | [23]                     |
| Doublet microtubules in flagella       | <i>Chlamydomonas</i> and sea urchin sperm, drc Mutants  | [24]      | 2011             | 1980     | 6 to 8               | 3.3             | 1               | 1       | C1, longitudinal repeat | 200                |             | 2048            | 300                        | yes                 | 130                    | 100                                     | 96                       | no              | [25]                     |
|                                        | <i>Chlamydomonas</i> and sea urchin sperm, pWT          |           | 2011             | 720      | 6 to 8               | 3.4             | 1               | 1       | C1, longitudinal repeat | 200                |             | 2048            | 300                        | yes                 | 130                    | 100                                     | 96                       | no              |                          |
|                                        | <i>Chlamydomonas</i> and sea urchin sperm, pWT          |           | 2011             | 210      | 6 to 8               | 3.9             | 1               | 1       | C1, longitudinal repeat | 200                |             | 2048            | 300                        | yes                 | 130                    | 100                                     | 96                       | no              |                          |
|                                        | <i>Chlamydomonas</i> and sea urchin sperm, in Flagella  |           | 2011             | 470      | 6 to 8               | 3.6             | 1               | 1       | C1, longitudinal repeat | 200                |             | 2048            | 300                        | yes                 | 130                    | 100                                     | 96                       | no              |                          |
|                                        | <i>Chlamydomonas</i> and sea urchin sperm, isolated DMT |           | 2011             | 118      | 6 to 8               | 3.8             | 1               | 1       | C1, longitudinal repeat | 200                |             | 2048            | 300                        | yes                 | 130                    | 100                                     | 96                       | no              |                          |
| Flagella                               | sea urchin sperm                                        | [26]      | 2006             |          | 3.5 to 5             | 3               | 0.53            | 1       | 1                       | 100                |             | 2048            | 300                        | yes                 | 130                    | 65                                      | 96                       | no              | [12] and [5]             |
| Flagella                               | sea urchin sperm                                        | [27]      | 2005             | 56       | 3 to 6               | 5.8             | 0.59            | 1       | 1                       | 200                |             | 2048            | 300                        | yes                 | 130                    | 100                                     | 96                       | no              | [28]                     |
|                                        | Bacteriophage P1 infecting e.coli                       | [29]      | 2011             | 219      | 9                    |                 | 0.78            | 3       | 5 and 6                 | 300                |             | 2048            | 300                        | no                  | 128                    | 100                                     | 278                      | no              | [2]                      |
|                                        | Dengue virus                                            | [30]      | 2011             | 30       | 3 to 5               | 4               | 0.78            | 1       | icosahedral             | 150                |             | 2048            | 120                        | yes                 | 128                    | 85                                      | 78                       | no              | [15]                     |
| Torroidal surface complex              | Bacteriophage φ12                                       | [31]      | 2011             | 744      | 8                    | 2.6             | 0.88            | 1       | C6                      | 100                |             | 2048            | 300                        | yes                 | 130                    | 80                                      | 22                       | no              | [8]                      |
| Chemotactic arrays                     | <i>E. coli</i>                                          | [32]      | 2011             | 1098     | 5 to 8               | 3.3             | 0.75            | 1       | C6                      | 600                | 18          | 2048            | 300                        | yes                 | 140                    | 70-280                                  | 113                      | no              | [15]                     |
| Bacterial flagellar motor, FliL-mutant | <i>Borrelia burgdorferi</i>                             | [33]      | 2011             | 711      | 5                    | 4               | 0.56            | 1       | 1                       | 300                |             | 4096            | 300                        | no                  | 128                    | 100                                     | 143                      | no              | [2]                      |
| Envelope Glycoproteins                 | Trimeric Simian Immunodeficiency Virus                  | [34]      | 2010             | 4000     | 2.5                  | 2               | 0.41            | 10      | C3                      | 100                | 34          | 2048            | 200                        | yes                 | 130                    | 90                                      | 41                       | no              | [23]                     |
| GAG protein layer                      | HIV-1                                                   | [35]      | 2010             |          | 2.6 to 2.9           | 2.65            | 0.4             | 1       | C6                      | 150                |             | 2048            | 300                        | yes                 | 120                    | 90                                      | 38                       | no              | [8]                      |
| GAG protein layer                      | Native HIV-1 budding sites                              | [36]      | 2010             |          | 6 to 8               | 4               | 0.713-0.82      | 1       | C6                      |                    |             | 2048            | 300                        | yes                 | 120                    | 80                                      | 38                       | no              | [8]                      |
| Photosystem II                         | Spinach chloroplasts                                    | [37]      | 2011             | 100      | 8                    | 4               | 0.58            | 1       | 1                       | 150                |             | 2048            | 300                        | yes                 | 136                    | 80                                      | 32                       |                 | [25], [15]               |
| GAG protein layer                      | HIV-1                                                   | [38]      | 2011             |          | 4 (first zero 3.7nm) | 4               | 0.78            |         |                         | 150                |             | 2048            | 120                        | yes                 | 132                    | 70                                      | 125                      |                 | [12]                     |
|                                        | RNA releasing poliovirus                                | [39]      | 2011             | 540      | 6                    | 4.5             | 0.42            | 1       | icosahedral             | 60                 | 34          | 2048            | 300                        | yes                 | 140                    | 140                                     | 54                       | no              | [5]                      |
| Double hairpin                         | Moloney murine leukemia virus                           | [40]      | 2010             | 38       | 8                    |                 | 0.65            | 2       | 1                       |                    | 23          | 4096            | 200                        | yes                 | 120                    | 90                                      | 10                       | no              | [4]                      |
| Flagellar motor                        | <i>Treponema pallidum</i>                               | [41]      | 2010             | 830      | 4 to 6               | 4               | 0.28            | 1       | 1                       | 300                |             | 4096            | 300                        | no                  | 130                    | 100                                     | 143                      | no              | [2]                      |
| Surface Layer                          | <i>Caulobacter crescentus</i>                           | [42]      | 2010             | 3777     | 3.6 to 12            |                 | 0.69            | 2       | C6                      | 500                |             | 2048            | 300                        | yes                 | 124                    | 140                                     | 76                       | no              | [8] and [43]             |
| GAG protein layer                      | HIV                                                     | [44]      | 2010             | 9698     | 4.5                  | 2.8             | 0.4             | 1       | C6                      | 150                |             | 2048            | 300                        | yes                 | 120                    | 70                                      | 38                       | no              | [8]                      |

| Protein complex                   | Origin                                             | Reference | Publication Year | N part | Under-focus [ $\mu\text{m}$ ] | Resolution [nm] | Pixel size [nm] | Classes | Symmetry    | Ice thickness [nm] | mag [x1000] | Camera [pixels] | Accelerating voltage [keV] | Energy filter used? | Angular coverage [deg] | Total electron dose [ $\text{e}/\text{Å}^2$ ] | Largest linear size [nm] | Dual tilt used? | Data processing software |
|-----------------------------------|----------------------------------------------------|-----------|------------------|--------|-------------------------------|-----------------|-----------------|---------|-------------|--------------------|-------------|-----------------|----------------------------|---------------------|------------------------|-----------------------------------------------|--------------------------|-----------------|--------------------------|
|                                   | HIV                                                |           | 2010             | 5438   | 2.1                           | 2.55            | 0.4             | 1       | C6          | 150                |             | 2048            | 300                        | yes                 | 120                    | 70                                            | 38                       | no              |                          |
|                                   | M-PVM                                              |           | 2010             | 10858  | 2.2                           | 2.65            | 0.4             | 1       | C6          | 150                |             | 2048            | 300                        | yes                 | 120                    | 70                                            | 38                       | no              |                          |
|                                   | RSV                                                |           | 2010             | 6732   | 2                             | 2.3             | 0.4             | 1       | C6          | 150                |             | 2048            | 300                        | yes                 | 120                    | 70                                            | 38                       | no              |                          |
| Thermosomes                       |                                                    | [11]      | 2010             | 3455   | 2.5                           |                 | 0.43            | 3       | 1           | 50                 |             | 2048            | 160                        | no                  | 120                    |                                               | 34                       | no              | [11]                     |
| Phage head head                   | Epsilon15 Bacteriophage                            | [45]      | 2010             | 50     | 0*                            | 2.5             |                 | 1       | icosahedral | 150                | 30          | 2048            | 300                        | yes                 | 140                    | 80                                            | 100                      | no              | [4]                      |
|                                   | Epsilon15 Bacteriophage                            |           | 2010             | 95     | 0*                            | 3               |                 | 1       | 1           | 150                | 30          | 2048            | 300                        | yes                 | 140                    | 80                                            | 100                      | no              |                          |
| Multidrug efflux pump             | <i>Pseudomonasaeruginosa</i>                       | [46]      | 2010             | 919    | 4                             | 3               |                 | 1       | C3          |                    | 27.5        | 2048            | 300                        | yes                 | 138                    | 60                                            | 21                       | no              | [5]                      |
| Podovirus P-SSP7                  | <i>Prochlorococcus host cells</i>                  | [47]      | 2010             | 29     |                               |                 |                 | 1       | 1           |                    |             | 4096            | 300                        | no                  |                        |                                               | 50                       | no              |                          |
|                                   | Bacteriophage $\phi 6$                             | [48]      | 2010             | 315    | 4                             | 3.7             | 0.78            | 1       | 1           | 50                 | 38.5        | 2048            | 120                        | yes                 | 140                    | 75                                            | 50                       | no              | [12]                     |
|                                   | Bacteriophage BPP-1                                | [49]      | 2009             | 60     |                               |                 | 0.39            |         |             |                    |             | 4096            | 300                        | no                  | 140                    | 100                                           | 68                       | no              |                          |
|                                   | Microtubule-kinesin complex                        | [50]      | 2010             | 99     | 6                             | 3.2             | 0.76            | 1       | helical 16  | 50                 | 29          | 4096            | 200                        | no                  | 140                    | 100                                           | 130                      | no              | [25]                     |
| Ribosomes                         | Human cells                                        | [51]      | 2010             | 1911   | 6                             | 3.9             | 0.82            | 2       | 1           | 200-400            | 17.5        | 2048            | 300                        | yes                 | 130                    | 85                                            | 30                       | no              | [8]                      |
| ATP synthase                      | <i>Polytomella mitochondria</i>                    | [52]      | 2010             | 166    | 10                            | 5.7             | 0.73            | 1       | 1           |                    |             | 2048            | 300                        | yes                 |                        | 80                                            | 87                       | yes             | [25]                     |
| Nuclear pore complex              | <i>Xenopus</i>                                     | [53]      | 2010             | 2488   | 4 to 6                        | 6.4             | 0.65            | 1       | 1           | 200                |             | 2048            | 300                        | yes                 | 124                    | -                                             | 150                      | no              | [8]                      |
| Bacterial flagellar motor         | <i>Treponema pallidum</i>                          | [54]      | 2009             |        | 15                            | 10              |                 |         |             | 300                |             |                 | 400                        | yes                 | 120                    | 120                                           |                          | no              | [5]                      |
|                                   | Bovine papiloma virus                              | [55]      | 2009             | 519    | 9#                            | 4               |                 | 1       | 12          | 50                 |             |                 | 300                        | yes                 |                        |                                               | 50                       | no              | [25]                     |
| Bacterial flagellar motor         | <i>Borrelia burgdorferi</i>                        | [56]      | 2010             | 138    | 10                            | 4.6             | 0.82            | 1       | c16         | 300                |             | 2048            | 300                        | yes                 | 120                    | 200                                           | 100                      | no              | [8]                      |
|                                   | PRD1 bacteriophage                                 | [57]      | 2009             | 311    | 3 to 5.6 (mean 4) #           | 2.2             | 0.47            | 1       | icosahedral | 100                |             | 2048            | 300                        | yes                 | 126                    | 70                                            | 100                      | no              | [8] and [12]             |
| Bacterial flagellar motor         | <i>Borrelia burgdorferi</i>                        | [58]      | 2009             | 1280   | 4 to 6                        | 3.5             | 0.22            | 1       | 1           | 300                |             | 4096            | 300                        | no                  | 130                    | 100                                           | 100                      | no              | [2]                      |
|                                   | <i>Borrelia burgdorferi</i> , transposon mutant    |           | 2009             | 1100   | 4 to 6                        | 3.5             | 0.22            | 1       | 1           | 300                |             | 4096            | 300                        | no                  | 130                    | 100                                           | 100                      | no              |                          |
|                                   | detergent treated <i>Borrelia Burgdoferii</i> , WT |           | 2009             | 454    | 4 to 6                        | 3               | 0.22            | 1       | 1           | 300                |             | 4096            | 300                        | no                  | 130                    | 100                                           | 50                       | no              |                          |
| Triad Junctions                   |                                                    | [59]      | 2009             | 49     | 10                            | 7.1             | 0.5             | 3       | C4          | 250                |             | 1024            | 200                        | no                  | 120                    | -                                             | 30                       | no              | [5]                      |
| Flagella                          | <i>Chlamydomonas</i> , WT                          | [60]      | 2008             | 559    | 2 to 4                        | 4.1             | 0.7             | 1       | 1           |                    | 19.3        | 2048            | 200                        | yes                 | 120                    | -                                             | 96                       | no              | [5] and [61]             |
|                                   | <i>Chlamydomonas</i> , oda1-                       |           | 2008             | 656    | 2 to 4                        | 3.8             | 0.7             | 1       | 1           |                    | 19.3        | 2048            | 200                        | yes                 | 120                    | -                                             | 96                       | no              |                          |
| Chemotactic arrays, TsrQEQE       | <i>E. coli</i>                                     | [62]      | 2008             | 3972   | 5 to 8                        | 3.3             |                 | 2       | c3          | 500                | 44          | 2048            | 300                        | yes                 | 140                    | 60-80                                         | 20                       | no              | [15]                     |
| Chemotactic arrays TsrQEQE+serine | <i>E. coli</i>                                     |           | 2008             | 23505  | 5 to 8                        | 3.3             |                 | 1       | c3          | 500                | 44          | 2048            | 300                        | yes                 | 140                    | 60-80                                         | 20                       | no              |                          |
| Chemotactic arrays                | <i>Caulobacter crescentus</i>                      | [63]      | 2008             | 1200   | 4 to 6                        |                 | 7.5             | 1       | c6          | 350                | 18          | 2048            | 300                        | yes                 | 140                    | 45-75                                         | 47                       | no              |                          |

| Protein complex                     | Origin                                | Reference | Publication Year | N part | Under-focus [μm] | Resolution [nm] | Pixel size [nm] | Classes | Symmetry       | Ice thickness [nm] | mag [x1000] | Camera [pixels] | Accelerating voltage [keV] | Energy filter used? | Angular coverage [deg] | Total electron dose [e/Å <sup>2</sup> ] | Largest linear size [nm] | Dual tilt used? | Data processing software |
|-------------------------------------|---------------------------------------|-----------|------------------|--------|------------------|-----------------|-----------------|---------|----------------|--------------------|-------------|-----------------|----------------------------|---------------------|------------------------|-----------------------------------------|--------------------------|-----------------|--------------------------|
| gp120 trimers                       | HIV-1                                 | [64]      | 2008             |        | 2                | 2.2             | 4.1             | 1       | c3             | 150                |             | 2048            | 200                        | yes                 | 140                    | 80                                      | 15                       | no              | [2]                      |
| ATP synthase dimers                 | rat liver                             | [65]      | 2008             | 235    | 10 to 15         | 5               |                 | 1       | 1              | 160                |             | 2048            | 300                        | yes                 |                        | 100 - 200                               | 40                       | no              | [5]                      |
|                                     | Simian Virus 40                       | [66]      | 2007             | 13     | 10               | 7               | 0.55            | 1       | icosahedral    | 100                |             | 2048            | 300                        | yes                 |                        | 55-75                                   | 50                       | no              | [8] and [12]             |
| Donut-shaped surface spike          | cystovirus φ12                        | [67]      | 2008             | 1300   | 8#               | 4.6             |                 | 1       | 1              | 150                | 43          | 4096            | 200                        | no                  | 140                    | 30-40                                   | 20                       | no              | [5] and [2]              |
| Cadherins in desmosomes             |                                       | [68]      | 2007             |        | 4 to 9           | 3.4             | 0.6             | 1       | 1              | 50\$               |             | 2048            | 300                        | yes                 | 130                    | 40                                      | 34                       | no              |                          |
| Nuclear pore complex                | <i>Dictyostelium discoideum</i>       | [69]      | 2007             | 4184   | 12 to 15         | 5.8             | 0.82            | 1       | 1              | 500                |             | 2048            | 300                        | yes                 | 126                    | NA                                      | 150                      | no              | [8]                      |
| Outer dynein arms                   |                                       | [70]      | 2007             | 667    | 2 to 3           | 4.5             |                 | 1       | 1              | 250                |             | 2048            | 200                        | yes                 | 120                    | 30                                      | 120                      | no              |                          |
| ENV spike                           | SIV                                   | [71]      | 2006             | 2986   | 4 to 6           | 2.8             | 0.55            | 1       | c3             | 150                |             | 2048            | 300                        | yes                 | 123                    | 50 to 70                                | 12                       | no              | [8]                      |
| Portal                              | Herpes Simplex Virus                  | [72]      | 2006             | 150    |                  | 5.5             | 0.78            | 1       | c5             | 150                | 38          | 2048            | 120                        | yes                 | 114                    | 35 to 80                                | 150                      | no              | [12]                     |
| Nuclear pore complex                | Isolated Xenopus nuclear envelope     | [73]      | 2003             | 446    | 1.5              | 12              |                 | 1       | c8             | 200                |             | 1024            | 120                        | yes                 | 120                    | 20 to 28                                | 150                      | no              | [28]                     |
|                                     | Hepes Simplex Virus                   | [74]      | 2003             | 11     | 8                | 5.6             |                 | 1       | icosahedral    | 250                |             |                 | 120                        | no                  | 123                    | 40                                      | 50                       | no              | [12]                     |
| Envelope protein                    | Retrovirus                            | [8]       | 2005             | 1114   | 4 to 6           | 2.7             | 5.5             | 1       | c3             | 100                | 55          | 2048            | 300                        | yes                 | 132                    |                                         | 20                       | no              | [8]                      |
| Thermosome                          |                                       | [75]      | 1997             | 307    |                  | 2               | 0.48            | 1       | 82 point group | 50                 |             |                 | 120                        | no                  | 101                    | 20                                      | 20                       | no              | [28]                     |
| GAG protein layer                   | Immature HIV                          | [76]      | 2009             |        | 2 to 5#          | 1.7             | 0.4             | 1       | 1              | 150                |             | 2048            | 300                        | yes                 | 126                    | 70                                      | 100                      | no              | [8]                      |
| Matrix protein                      | Measles virus                         | [77]      | 2011             | 1400   | 3 to 6           | 4.4             | 0.38            | 1       | 1              |                    | 39.4        | 2048            | 200                        | no                  | 120                    |                                         | 50                       | no              | [78]                     |
| Radial spokes of cilia and flagella |                                       | [79]      | 2011             | 2400   | 3 to 5           | 3.9             |                 | 1       | 1              | 220                | 19          | 2048            | 200                        | yes                 | 120                    |                                         | 96                       | no              | [12] and [5]             |
| Radial spokes in cilia and flagella |                                       | [80]      | 2012             | 1300   | 8                | 3.6             | 1               | 1       | 1              | 200                | 13.5        | 2048            | 300                        | yes                 |                        | 100                                     | 96                       | no              | [25]                     |
| Bovine respirasome                  |                                       | [81]      | 2011             | 2466   | 2                | 2.2             | 0.38            | 1       | 1              | 50                 | 78          | 2048            | 200                        | yes                 | 130                    | 40                                      | 30                       | no              | [8] and [11]             |
| Envelope Glycoproteins              | Simian Immunodeficiency Virus         | [22]      | 2011             | 4826   | 2.5              | 2.5             | 0.41            | 1       | c3             | 100                |             | 2048            | 200                        | yes                 | 125                    | 70-140                                  | 41                       | no              | [23]                     |
| Chromatin fibers                    |                                       | [82]      | 2011             | 1000   | 6.5 to 8         | 4.3             | 0.6             | 1       | 1              | 80\$               | 22500       | 2048            | 300                        | yes                 | 126                    | 90                                      | 60                       | no              | [83] and [84]            |
| gp140                               | HIV-1                                 | [85]      | 2011             | 4000   | 2.5              | 2               | 0.41            | 1       | C3             | 100                | 34          | 2048            | 200                        | yes                 | 130                    | 90                                      | 41                       | no              | [23]                     |
| Desmosomal plaque                   |                                       | [86]      | 2011             |        | 4 to 9           | 3.2             | 0.6             | 1       | 1              | 50\$               |             | 2048            | 300                        | yes                 | 130                    | 40                                      | 25                       | no              | [8]                      |
| Envelope spikes                     | HIV-1                                 | [87]      | 2011             | 1463   | 4 to 5           | 3.3             | 0.23            | 1       | c3             | 170                | 39          | 4096            | 300                        | no                  | 130                    | 100                                     | 14                       | no              | [2]                      |
| envelope spikes                     | AIDS virus                            | [88]      | 2006             | 6175   | 4 to 6           | 3.2             | 0.56            | 1       | c3             | 150                | 43          | 2048            | 300                        | no                  | 140                    | 60                                      | 14                       | no              | [2]                      |
| RNA Packaging Element               | Retrovirus                            | [89]      | 2010             | 47     |                  | 4               | 0.65            | 2       | 1              | 50                 | 23          | 4096            | 200                        | yes                 | 120                    |                                         | 10                       | no              |                          |
|                                     | Suffolobus turreted icosahedral virus | [90]      | 2010             | 123    | 10 to 14         | 6.5             | 1.26            | 2       | icosahedral    | 300                | 18          | 4096            | 300                        | yes                 | 120                    | 160                                     | 100                      | no              | [91]                     |
| Hibernating ribosomes               | Bacterial cell lyzates                | [92]      | 2010             | 1232   | 3                |                 | 0.28            | 1       | 1              | 100                | 54          | 4096            | 160                        | no                  | 120                    | 50                                      | 50                       | no              | [8]                      |

| Protein complex                                                  | Origin                                  | Reference | Publication Year | N part | Under-focus [μm] | Resolution [nm] | Pixel size [nm] | Classes | Symmetry       | Ice thickness [nm] | mag [x1000] | Camera [pixels] | Accelerating voltage [keV] | Energy filter used? | Angular coverage [deg] | Total electron dose [e/Å <sup>2</sup> ] | Largest linear size [nm] | Dual tilt used? | Data processing software |
|------------------------------------------------------------------|-----------------------------------------|-----------|------------------|--------|------------------|-----------------|-----------------|---------|----------------|--------------------|-------------|-----------------|----------------------------|---------------------|------------------------|-----------------------------------------|--------------------------|-----------------|--------------------------|
|                                                                  | Intact starved E.coli                   |           | 2010             | 601    | 9#               | 3               | 0.71            | 1       | 1              | 400                | 42          | 2048            | 300                        | yes                 | 120                    |                                         | 50                       | no              |                          |
| Bacterial membrane Eflux pump                                    |                                         | [46]      | 2010             | 919    | 4                | 3               | 0.82            | 1       | 1              | 100                | 27.5        | 2048            | 300                        | yes                 | 138                    | 60                                      | 30                       | no              | [5]                      |
| PSII in chloroplast membranes                                    |                                         | [93]      | 2010             | 300    | 6 to 10          |                 | 0.71            | 1       | 2              | 150\$              |             | 2048            | 300                        | yes                 | 130                    | 150                                     | 10                       | no              | [25]                     |
| ATP synthase in chloroplast membranes                            |                                         |           | 2010             | 50     | 6 to 10          |                 | 0.71            | 1       | 1              | 150\$              |             | 2048            | 300                        | yes                 | 130                    | 150                                     | 12                       | no              |                          |
|                                                                  | <i>Bordetella</i> bacteriophage         | [49]      | 2010             | 60     |                  |                 | 0.4             | 1       | icosahedral    | 100                |             | 4096            | 300                        | no                  | 140                    | 100                                     | 70                       | no              | [2]                      |
| Dynein regulatory complex in cilia and flagella                  |                                         | [94]      | 2009             | 720    | 6 to 8           | 3.3             |                 | 1       | 1              |                    | 13.5        | 2048            | 300                        | yes                 | 130                    | 100                                     | 96                       | no              | [25]                     |
| Inner dynein arms and inter-doublet links in                     | <i>Chlamydomonas</i> flagella           | [95]      | 2009             | 405    | 2 to 4           |                 |                 |         |                |                    |             | 2048            | 200                        | yes                 | 120                    |                                         | 96                       | no              | [12] and [5]             |
| ATP synthase dimers                                              |                                         | [52]      | 2009             | 550    | 10               | 5.7             | 0.7             | 1       | c2             | 500                | 41.4        | 2048            | 300                        | yes                 |                        | 80                                      | 30                       | yes             | [25]                     |
| Envelope Spikes                                                  | HIV-1                                   | [96]      | 2008             | 2070   |                  |                 | 0.56            | 8       | c3             | 100                | 43          | 2048            | 300                        | no                  | 130                    | 100                                     | 12                       | no              | [2]                      |
|                                                                  | Rift Valley Fever Virus                 | [97]      | 2008             | 46     |                  | 6               |                 | 1       | icosahedral    | 150                | 15          | 4096            | 200                        |                     | 136                    |                                         | 100                      | no              | [15] and [4]             |
| Integrin α <sub>IIb</sub> β <sub>3</sub> in Membrane Environment |                                         | [98]      | 2008             | 1715   | 6                |                 | 0.56            |         |                |                    |             | 2048            | 300                        | no                  | 124                    |                                         | 11                       | no              | [2]                      |
|                                                                  | Kaposi's sarcoma-associated herpesvirus | [99]      | 2008             | 297    | 8                |                 | 0.89            | 1       | 1              |                    |             | 4096            | 300                        |                     | 140                    |                                         | 100                      | no              | [100]                    |
| Receptor-membrane complex                                        | Poliovirus                              | [101]     | 2007             | 1200   | 4                | 3               | 0.99            | 1       | c5             | 150                |             | 2048            | 300                        | yes                 | 132                    | 100                                     | 50                       | no              | [5] and [25]             |
| 26S proteasome                                                   |                                         | [102]     | 2006             | 153    | 2.5              | 3.5             | 0.39            | 1       | c2             | 80                 | 36          |                 | 160                        | no                  | 120                    | 20                                      | 50                       | no              | [61]                     |
| Capsid                                                           | Herpesvirus                             | [103]     | 2007             | 38     |                  | 5.7             |                 | 1       | icosahedral    | 200                | 27.8        |                 | 200                        | no                  | 140                    | 50                                      | 200                      | no              | [4]                      |
| Glycoprotein spikes                                              | Influenza                               | [104]     | 2006             |        | 4 to 6           |                 | 0.78            |         |                | 150                |             | 2048            | 120                        | yes                 | 136                    | 55                                      | 20                       | no              |                          |
| Axonemes                                                         | <i>Chlamydomonas</i>                    | [25]      | 2006             | 280    | 6 to 8           | 4               | 0.95            | 1       | 1              | 200                |             | 2048            | 300                        | yes                 | 130                    | 100                                     | 96                       | no              | [25]                     |
| Bacterial flagellar motor                                        | <i>Treponema primitia</i>               | [105]     | 2006             | 20     | 10 to 18         | 7               | 0.98            | 1       | c16            | 250                |             | 2048            | 300                        | yes                 | 126                    | 110                                     | 100                      | no              | [12] and [18]            |
| Myosin V (neg stain)                                             |                                         | [106]     | 2006             | 4029   | 5 to 12#         | 2.4             | 0.56            | 1       | C6             | 50                 | 43          | 2048            | 300                        | no                  | 140                    | 30                                      | 40                       | yes             | [5]                      |
| Virus core                                                       | Hepatitis B                             | [107]     | 2006             | 80     | 5.7#             | 2.4             | 5               | 1       | icosahedral    |                    |             | 2048            | 300                        | no                  | 102                    |                                         |                          | no              | [12]                     |
| Pyruvate and 2-Oxoglutarate Dehydrogenase Complexes              | <i>E. coli</i>                          | [108]     | 2005             | 305    | 10               | 5.5             | 0.82            | 1       | octahedral     | 50                 | 27.5        | 2048            | 300                        | yes                 | 126                    | 120                                     | 15                       | yes             | [12] and [18]            |
| Thermosome                                                       |                                         | [109]     | 1998             | 307    | 2                | 2.8             | 0.48            | 1       | 82 point group | 50                 | 39          |                 | 120                        | no                  | 101                    | 20                                      | 20                       | no              | [28]                     |
| Nuclear pore complex                                             | <i>Dictyostelium discoideum</i>         | [110]     | 2004             | 267    | 15               | 8.3             | 0.82            |         | c8             | 500                |             | 2048            | 300                        | yes                 | 126                    |                                         | 150                      | no              | [8]                      |

Table S1. Protein complexes studied by cryo electron tomography and sub-tomogram averaging with acquisition parameters.

## Remarks for Table S1:

- Each publication may contain several structures acquired at different imaging conditions, in such cases several rows are possible for one publication
- Publication year may mismatch with the values in the table due to advance publication date.
- In cases resolution was not explicitly specified but the Fourier Shell Correlation (FSC) curve was provided, we estimated the resolution from the intersection of the FSC curve with the 0.5 – line.
- For underfocus values, # indicates that CTF correction was applied, \* indicates the use of a phase plate.
- Number of classes and symmetry was assumed to be 1 resp. p1, unless another value is specified.
- Accelerating voltage was assumed to be highest achievable for the specified microscope unless another value specified.
- Ice thickness is specified in some manuscripts, for others we estimated as minimal possible ice thickness the dimension needed for accommodating the samples.

## References

1. Zhang K, Tong BA, Liu J, Li C (2012) A single-domain FlgJ contributes to flagellar hook and filament formation in the Lyme disease spirochete *Borrelia burgdorferi*. *J Bacteriol* 194: 866-874.
2. Winkler H (2007) 3D reconstruction and processing of volumetric data in cryo-electron tomography. *J Struct Biol* 157: 126-137.
3. Li S, Fernandez JJ, Marshall WF, Agard DA (2012) Three-dimensional structure of basal body triplet revealed by electron cryo-tomography. *Embo J* 31: 552-562.
4. Schmid MF, Booth CR (2008) Methods for aligning and for averaging 3D volumes with missing data. *J Struct Biol* 161: 243-248.
5. Frank J, Radermacher M, Penczek P, Zhu J, Li Y, et al. (1996) SPIDER and WEB: processing and visualization of images in 3D electron microscopy and related fields. *J Struct Biol* 116: 190-199.
6. Beniac DR, Melito PL, Devarenes SL, Hiebert SL, Rabb MJ, et al. (2012) The organisation of Ebola virus reveals a capacity for extensive, modular polyploidy. *PLoS ONE* 7: e29608.
7. Bharat TA, Riches JD, Kolesnikova L, Welsch S, Krahling V, et al. (2011) Cryo-electron tomography of Marburg virus particles and their morphogenesis within infected cells. *PLoS Biol* 9: e1001196.
8. Forster F, Medalia O, Zauberman N, Baumeister W, Fass D (2005) Retrovirus envelope protein complex structure in situ studied by cryo-electron tomography. *Proc Natl Acad Sci U S A* 102: 4729-4734.
9. Castano-Diez D, Kudryashev M, Arbeit M, Stahlberg H (2012) Dynamo: A flexible, user-friendly development tool for subtomogram averaging of cryo-EM data in high-performance computing environments. *J Struct Biol* 178:139-151
10. Fontana J, Cardone G, Heymann JB, Winkler DC, Steven AC (2012) Structural Changes in Influenza Virus at Low pH Characterized by Cryo-Electron Tomography. *Journal of virology* 86: 2919-2929.
11. Stolken M, Beck F, Haller T, Hegerl R, Gutsche I, et al. (2011) Maximum likelihood based classification of electron tomographic data. *J Struct Biol* 173: 77-85.

12. Heymann JB, Cardone G, Winkler DC, Steven AC (2008) Computational resources for cryo-electron tomography in Bsoft. *J Struct Biol* 161: 232-242.
13. Ueno H, Ishikawa T, Bui KH, Gonda K, Yamaguchi T (2012) Mouse respiratory cilia with the asymmetric axonemal structure on sparsely distributed ciliary cells can generate overall directional flow. *Nanomedicine*. doi:10.1016/j.nano.2012.01.004
14. Koefman AY, Schmid MF, Gheiratmand L, Fu CJ, Khant HA, et al. (2011) Structure of *Trypanosoma brucei* flagellum accounts for its bihelical motion. *Proc Natl Acad Sci U S A* 108: 11105-11108.
15. Ludtke SJ, Baldwin PR, Chiu W (1999) EMAN: semiautomated software for high-resolution single-particle reconstructions. *J Struct Biol* 128: 82-97.
16. Wu S, Liu J, Reedy MC, Tregear RT, Winkler H, et al. (2010) Electron tomography of cryofixed, isometrically contracting insect flight muscle reveals novel actin-myosin interactions. *PLoS ONE* 5: e12643. doi:10.1371/journal.pone.0012643
17. Chen S, Beeby M, Murphy GE, Leadbetter JR, Hendrixson DR, et al. (2011) Structural diversity of bacterial flagellar motors. *Embo J* 30: 2972-2981.
18. Leong PA, Heymann JB, Jensen GJ (2005) Peach: a simple Perl-based system for distributed computation and its application to cryo-EM data processing. *Structure* 13: 505-511.
19. Barber CF, Heuser T, Carbajal-Gonzalez BI, Botchkarev VV, Jr., Nicastro D (2012) Three-dimensional structure of the radial spokes reveals heterogeneity and interactions with dyneins in *Chlamydomonas* flagella. *Mol Biol Cell* 23: 111-120.
20. Nemecek D, Cheng N, Qiao J, Mindich L, Steven AC, et al. (2011) Stepwise expansion of the bacteriophage varphi6 procapsid: possible packaging intermediates. *Journal of molecular biology* 414: 260-271.
21. Fu X, Walter MH, Paredes A, Morais MC, Liu J (2011) The mechanism of DNA ejection in the *Bacillus anthracis* spore-binding phage 8a revealed by cryo-electron tomography. *Virology* 421: 141-148.
22. White TA, Bartesaghi A, Borgnia MJ, de la Cruz MJ, Nandwani R, et al. (2011) Three-dimensional structures of soluble CD4-bound states of trimeric simian immunodeficiency virus envelope glycoproteins determined by using cryo-electron tomography. *Journal of virology* 85: 12114-12123.
23. Bartesaghi A, Sprechmann P, Liu J, Randall G, Sapiro G, et al. (2008) Classification and 3D averaging with missing wedge correction in biological electron tomography. *J Struct Biol* 162: 436-450.

24. Nicastro D, Fu X, Heuser T, Tso A, Porter ME, et al. (2011) Cryo-electron tomography reveals conserved features of doublet microtubules in flagella. *Proc Natl Acad Sci U S A* 108: E845-853.
25. Nicastro D, Schwartz C, Pierson J, Gaudette R, Porter ME, et al. (2006) The molecular architecture of axonemes revealed by cryoelectron tomography. *Science* 313: 944-948.
26. Sui H, Downing KH (2006) Molecular architecture of axonemal microtubule doublets revealed by cryo-electron tomography. *Nature* 442: 475-478.
27. Nicastro D, McIntosh JR, Baumeister W (2005) 3D structure of eukaryotic flagella in a quiescent state revealed by cryo-electron tomography. *Proc Natl Acad Sci U S A* 102: 15889-15894.
28. Hegerl R (1996) The EM Program Package: A Platform for Image Processing in Biological Electron Microscopy. *J Struct Biol* 116: 30-34.
29. Liu J, Chen CY, Shiomi D, Niki H, Margolin W (2011) Visualization of bacteriophage P1 infection by cryo-electron tomography of tiny *Escherichia coli*. *Virology* 417: 304-311.
30. Plevka P, Battisti AJ, Junjhon J, Winkler DC, Holdaway HA, et al. (2011) Maturation of flaviviruses starts from one or more icosahedrally independent nucleation centres. *Embo rep* 12: 602-606.
31. Leo-Macias A, Katz G, Wei H, Alimova A, Katz A, et al. (2011) Toroidal surface complexes of bacteriophage varphi12 are responsible for host-cell attachment. *Virology* 414: 103-109.
32. Khursigara CM, Lan G, Neumann S, Wu X, Ravindran S, et al. (2011) Lateral density of receptor arrays in the membrane plane influences sensitivity of the *E. coli* chemotaxis response. *Embo J* 30: 1719-1729.
33. Motaleb MA, Pitzer JE, Sultan SZ, Liu J (2011) A novel gene inactivation system reveals altered periplasmic flagellar orientation in a *Borrelia burgdorferi* fliL mutant. *J Bacteriol* 193: 3324-3331.
34. White TA, Bartesaghi A, Borgnia MJ, Meyerson JR, de la Cruz MJ, et al. (2010) Molecular architectures of trimeric SIV and HIV-1 envelope glycoproteins on intact viruses: strain-dependent variation in quaternary structure. *PLoS pathogens* 6: e1001249.
35. de Marco A, Muller B, Glass B, Riches JD, Krausslich HG, et al. (2010) Structural analysis of HIV-1 maturation using cryo-electron tomography. *PLoS pathogens* 6: e1001215.
36. Carlson LA, de Marco A, Oberwinkler H, Habermann A, Briggs JA, et al. (2010) Cryo electron tomography of native HIV-1 budding sites. *PLoS pathogens* 6: e1001173.

37. Kouril R, Oostergetel GT, Boekema EJ (2011) Fine structure of granal thylakoid membrane organization using cryo electron tomography. *Biochimica et biophysica acta* 1807: 368-374.
38. Keller PW, Adamson CS, Heymann JB, Freed EO, Steven AC (2011) HIV-1 maturation inhibitor bevirimat stabilizes the immature Gag lattice. *Journal of virology* 85: 1420-1428.
39. Bostina M, Levy H, Filman DJ, Hogle JM (2011) Poliovirus RNA is released from the capsid near a twofold symmetry axis. *Journal of virology* 85: 776-783.
40. Miyazaki Y, Garcia EL, King SR, Iyalla K, Loeliger K, et al. (2010) An RNA structural switch regulates diploid genome packaging by Moloney murine leukemia virus. *Journal of molecular biology* 396: 141-152.
41. Liu J, Howell JK, Bradley SD, Zheng Y, Zhou ZH, et al. (2010) Cellular architecture of *Treponema pallidum*: novel flagellum, periplasmic cone, and cell envelope as revealed by cryo electron tomography. *Journal of molecular biology* 403: 546-561.
42. Amat F, Comolli LR, Nomellini JF, Moussavi F, Downing KH, et al. (2010) Analysis of the intact surface layer of *Caulobacter crescentus* by cryo-electron tomography. *J Bacteriol* 192: 5855-5865.
43. Amat F, Comolli LR, Moussavi F, Smit J, Downing KH, et al. (2010) Subtomogram alignment by adaptive Fourier coefficient thresholding. *Journal of structural biology* 171: 332-344.
44. de Marco A, Davey NE, Ulbrich P, Phillips JM, Lux V, et al. (2010) Conserved and variable features of Gag structure and arrangement in immature retrovirus particles. *Journal of virology* 84: 11729-11736.
45. Murata K, Liu X, Danev R, Jakana J, Schmid MF, et al. (2010) Zernike phase contrast cryo-electron microscopy and tomography for structure determination at nanometer and subnanometer resolutions. *Structure* 18: 903-912.
46. Trepout S, Taveau JC, Benabdelhak H, Granier T, Ducruix A, et al. (2010) Structure of reconstituted bacterial membrane efflux pump by cryo-electron tomography. *Biochimica et biophysica acta* 1798: 1953-1960.
47. Liu X, Zhang Q, Murata K, Baker ML, Sullivan MB, et al. (2010) Structural changes in a marine podovirus associated with release of its genome into *Prochlorococcus*. *Nature structural & molecular biology* 17: 830-836.

48. Nemecek D, Heymann JB, Qiao J, Mindich L, Steven AC (2010) Cryo-electron tomography of bacteriophage phi6 procapsids shows random occupancy of the binding sites for RNA polymerase and packaging NTPase. *J Struct Biol* 171: 389-396.
49. Dai W, Hodes A, Hui WH, Gingery M, Miller JF, et al. (2010) Three-dimensional structure of tropism-switching *Bordetella* bacteriophage. *Proc Natl Acad Sci U S A* 107: 4347-4352.
50. Cope J, Gilbert S, Rayment I, Mastronarde D, Hoenger A (2010) Cryo-electron tomography of microtubule-kinesin motor complexes. *J Struct Biol* 170: 257-265.
51. Brandt F, Carlson LA, Hartl FU, Baumeister W, Grunewald K (2010) The three-dimensional organization of polyribosomes in intact human cells. *Molecular cell* 39: 560-569.
52. Dudkina NV, Oostergetel GT, Lewejohann D, Braun HP, Boekema EJ (2010) Row-like organization of ATP synthase in intact mitochondria determined by cryo-electron tomography. *Biochimica et biophysica acta* 1797: 272-277.
53. Frenkiel-Krispin D, Maco B, Aebi U, Medalia O (2010) Structural analysis of a metazoan nuclear pore complex reveals a fused concentric ring architecture. *Journal of molecular biology* 395: 578-586.
54. Izard J, Renken C, Hsieh CE, Desrosiers DC, Dunham-Ems S, et al. (2009) Cryo-electron tomography elucidates the molecular architecture of *Treponema pallidum*, the syphilis spirochete. *J Bacteriol* 191: 7566-7580.
55. Xiong Q, Morpew MK, Schwartz CL, Hoenger AH, Mastronarde DN (2009) CTF determination and correction for low dose tomographic tilt series. *Journal of structural biology* 168: 378-387.
56. Kudryashev M, Cyrklaff M, Wallich R, Baumeister W, Frischknecht F (2010) Distinct in situ structures of the *Borrelia* flagellar motor. *J Struct Biol* 169: 54-61.
57. Zanetti G, Riches JD, Fuller SD, Briggs JA (2009) Contrast transfer function correction applied to cryo-electron tomography and sub-tomogram averaging. *Journal of structural biology* 168: 305-312.
58. Liu J, Lin T, Botkin DJ, McCrum E, Winkler H, et al. (2009) Intact flagellar motor of *Borrelia burgdorferi* revealed by cryo-electron tomography: evidence for stator ring curvature and rotor/C-ring assembly flexion. *J Bacteriol* 191: 5026-5036.
59. Renken C, Hsieh CE, Marko M, Rath B, Leith A, et al. (2009) Structure of frozen-hydrated triad junctions: a case study in motif searching inside tomograms. *J Struct Biol* 165: 53-63.

60. Bui KH, Sakakibara H, Movassagh T, Oiwa K, Ishikawa T (2008) Molecular architecture of inner dynein arms in situ in *Chlamydomonas reinhardtii* flagella. *J Cell Biol* 183: 923-932.
61. Nickell S, Forster F, Linaroudis A, Net WD, Beck F, et al. (2005) TOM software toolbox: acquisition and analysis for electron tomography. *J Struct Biol* 149: 227-234.
62. Khursigara CM, Wu X, Zhang P, Lefman J, Subramaniam S (2008) Role of HAMP domains in chemotaxis signaling by bacterial chemoreceptors. *Proc Natl Acad Sci U S A* 105: 16555-16560.
63. Khursigara CM, Wu X, Subramaniam S (2008) Chemoreceptors in *Caulobacter crescentus*: trimers of receptor dimers in a partially ordered hexagonally packed array. *J Bacteriol* 190: 6805-6810.
64. Liu J, Bartesaghi A, Borgnia MJ, Sapiro G, Subramaniam S (2008) Molecular architecture of native HIV-1 gp120 trimers. *Nature* 455: 109-113.
65. Strauss M, Hofhaus G, Schroder RR, Kuhlbrandt W (2008) Dimer ribbons of ATP synthase shape the inner mitochondrial membrane. *Embo J* 27: 1154-1160.
66. Schelhaas M, Malmstrom J, Pelkmans L, Haugstetter J, Ellgaard L, et al. (2007) Simian Virus 40 depends on ER protein folding and quality control factors for entry into host cells. *Cell* 131: 516-529.
67. Hu GB, Wei H, Rice WJ, Stokes DL, Gottlieb P (2008) Electron cryo-tomographic structure of cystovirus phi 12. *Virology* 372: 1-9.
68. Al-Amoudi A, Diez DC, Betts MJ, Frangakis AS (2007) The molecular architecture of cadherins in native epidermal desmosomes. *Nature* 450: 832-837.
69. Beck M, Lucic V, Forster F, Baumeister W, Medalia O (2007) Snapshots of nuclear pore complexes in action captured by cryo-electron tomography. *Nature* 449: 611-615.
70. Ishikawa T, Sakakibara H, Oiwa K (2007) The architecture of outer dynein arms in situ. *Journal of molecular biology* 368: 1249-1258.
71. Zanetti G, Briggs JA, Grunewald K, Sattentau QJ, Fuller SD (2006) Cryo-electron tomographic structure of an immunodeficiency virus envelope complex in situ. *PLoS pathogens* 2: e83.
72. Cardone G, Winkler DC, Trus BL, Cheng N, Heuser JE, et al. (2007) Visualization of the herpes simplex virus portal in situ by cryo-electron tomography. *Virology* 361: 426-434.

73. Stoffler D, Feja B, Fahrenkrog B, Walz J, Typke D, et al. (2003) Cryo-electron tomography provides novel insights into nuclear pore architecture: implications for nucleocytoplasmic transport. *Journal of molecular biology* 328: 119-130.
74. Grunewald K, Desai P, Winkler DC, Heymann JB, Belnap DM, et al. (2003) Three-dimensional structure of herpes simplex virus from cryo-electron tomography. *Science* 302: 1396-1398.
75. Walz J, Typke D, Nitsch M, Koster AJ, Hegerl R, et al. (1997) Electron Tomography of Single Ice-Embedded Macromolecules: Three-Dimensional Alignment and Classification. *J Struct Biol* 120: 387-395.
76. Briggs JA, Riches JD, Glass B, Bartonova V, Zanetti G, et al. (2009) Structure and assembly of immature HIV. *Proc Natl Acad Sci U S A* 106: 11090-11095.
77. Liljeroos L, Huiskonen JT, Ora A, Susi P, Butcher SJ (2011) Electron cryotomography of measles virus reveals how matrix protein coats the ribonucleocapsid within intact virions. *Proc Natl Acad Sci U S A* 108: 18085-18090.
78. Huiskonen JT, Hepojoki J, Laurinmaki P, Vaheri A, Lankinen H, et al. (2010) Electron cryotomography of Tula hantavirus suggests a unique assembly paradigm for enveloped viruses. *Journal of virology* 84: 4889-4897.
79. Pigino G, Bui KH, Maheshwari A, Lupetti P, Diener D, et al. (2011) Cryoelectron tomography of radial spokes in cilia and flagella. *J Cell Biol* 195: 673-687.
80. Lin J, Heuser T, Carbajal-Gonzalez BI, Song K, Nicastro D (2012) The structural heterogeneity of radial spokes in cilia and flagella is conserved. *Cytoskeleton (Hoboken)* 69: 88-100.
81. Dudkina NV, Kudryashev M, Stahlberg H, Boekema EJ (2011) Interaction of complexes I, III, and IV within the bovine respirasome by single particle cryoelectron tomography. *Proceedings of the National Academy of Sciences of the United States of America* 108: 15196-15200.
82. Scheffer MP, Eltsov M, Frangakis AS (2011) Evidence for short-range helical order in the 30-nm chromatin fibers of erythrocyte nuclei. *Proc Natl Acad Sci U S A* 108: 16992-16997.
83. Forster F, Pruggnaller S, Seybert A, Frangakis AS (2008) Classification of cryo-electron sub-tomograms using constrained correlation. *J Struct Biol* 161: 276-286.
84. Yu Z, Frangakis AS (2011) Classification of electron sub-tomograms with neural networks and its application to template-matching. *J Struct Biol* 174: 494-504.

85. Harris A, Borgnia MJ, Shi D, Bartesaghi A, He H, et al. (2011) Trimeric HIV-1 glycoprotein gp140 immunogens and native HIV-1 envelope glycoproteins display the same closed and open quaternary molecular architectures. *Proc Natl Acad Sci U S A* 108: 11440-11445.
86. Al-Amoudi A, Castano-Diez D, Devos DP, Russell RB, Johnson GT, et al. (2011) The three-dimensional molecular structure of the desmosomal plaque. *Proceedings of the National Academy of Sciences of the United States of America* 108: 6480-6485.
87. Hu G, Liu J, Taylor KA, Roux KH (2011) Structural comparison of HIV-1 envelope spikes with and without the V1/V2 loop. *Journal of virology* 85: 2741-2750.
88. Zhu P, Liu J, Bess J, Jr., Chertova E, Lifson JD, et al. (2006) Distribution and three-dimensional structure of AIDS virus envelope spikes. *Nature* 441: 847-852.
89. Miyazaki Y, Irobalieva RN, Tolbert BS, Smalls-Mantey A, Iyalla K, et al. (2010) Structure of a conserved retroviral RNA packaging element by NMR spectroscopy and cryo-electron tomography. *Journal of molecular biology* 404: 751-772.
90. Fu CY, Wang K, Gan L, Lanman J, Khayat R, et al. (2010) In vivo assembly of an archaeal virus studied with whole-cell electron cryotomography. *Structure* 18: 1579-1586.
91. Yin Z, Zheng Y, Doerschuk PC, Natarajan P, Johnson JE (2003) A statistical approach to computer processing of cryo-electron microscope images: virion classification and 3-D reconstruction. *J Struct Biol* 144: 24-50.
92. Ortiz JO, Brandt F, Matias VR, Sennels L, Rappsilber J, et al. (2010) Structure of hibernating ribosomes studied by cryoelectron tomography in vitro and in situ. *The Journal of cell biology* 190: 613-621.
93. Daum B, Nicastro D, Austin J, 2nd, McIntosh JR, Kuhlbrandt W (2010) Arrangement of photosystem II and ATP synthase in chloroplast membranes of spinach and pea. *Plant Cell* 22: 1299-1312.
94. Heuser T, Raytchev M, Krell J, Porter ME, Nicastro D (2009) The dynein regulatory complex is the nexin link and a major regulatory node in cilia and flagella. *J Cell Biol* 187: 921-933.
95. Bui KH, Sakakibara H, Movassagh T, Oiwa K, Ishikawa T (2009) Asymmetry of inner dynein arms and inter-doublet links in *Chlamydomonas* flagella. *J Cell Biol* 186: 437-446.
96. Zhu P, Winkler H, Chertova E, Taylor KA, Roux KH (2008) Cryoelectron tomography of HIV-1 envelope spikes: further evidence for tripod-like legs. *PLoS pathogens* 4: e1000203.

97. Freiberg AN, Sherman MB, Morais MC, Holbrook MR, Watowich SJ (2008) Three-dimensional organization of Rift Valley fever virus revealed by cryoelectron tomography. *Journal of virology* 82: 10341-10348.
98. Ye F, Liu J, Winkler H, Taylor KA (2008) Integrin alpha IIb beta 3 in a membrane environment remains the same height after Mn<sup>2+</sup> activation when observed by cryoelectron tomography. *Journal of molecular biology* 378: 976-986.
99. Deng B, O'Connor CM, Kedes DH, Zhou ZH (2008) Cryo-electron tomography of Kaposi's sarcoma-associated herpesvirus capsids reveals dynamic scaffolding structures essential to capsid assembly and maturation. *J Struct Biol* 161: 419-427.
100. Jiang W, Baker ML, Ludtke SJ, Chiu W (2001) Bridging the information gap: computational tools for intermediate resolution structure interpretation. *Journal of molecular biology* 308: 1033-1044.
101. Bostina M, Bubeck D, Schwartz C, Nicastro D, Filman DJ, et al. (2007) Single particle cryoelectron tomography characterization of the structure and structural variability of poliovirus-receptor-membrane complex at 30 Å resolution. *J Struct Biol* 160: 200-210.
102. Nickell S, Beck F, Korinek A, Mihalache O, Baumeister W, et al. (2007) Automated cryoelectron microscopy of "single particles" applied to the 26S proteasome. *FEBS Lett* 581: 2751-2756.
103. Chang JT, Schmid MF, Rixon FJ, Chiu W (2007) Electron cryotomography reveals the portal in the herpesvirus capsid. *Journal of virology* 81: 2065-2068.
104. Harris A, Cardone G, Winkler DC, Heymann JB, Brecher M, et al. (2006) Influenza virus pleiomorphy characterized by cryoelectron tomography. *Proc Natl Acad Sci U S A* 103: 19123-19127.
105. Murphy GE, Leadbetter JR, Jensen GJ (2006) In situ structure of the complete *Treponema primitia* flagellar motor. *Nature* 442: 1062-1064.
106. Liu J, Taylor DW, Krementsova EB, Trybus KM, Taylor KA (2006) Three-dimensional structure of the myosin V inhibited state by cryoelectron tomography. *Nature* 442: 208-211.
107. Fernandez JJ, Li S, Crowther RA (2006) CTF determination and correction in electron cryotomography. *Ultramicroscopy* 106: 587-596.
108. Murphy GE, Jensen GJ (2005) Electron cryotomography of the *E. coli* pyruvate and 2-oxoglutarate dehydrogenase complexes. *Structure* 13: 1765-1773.

109. Nitsch M, Walz J, Typke D, Klumpp M, Essen LO, et al. (1998) Group II chaperonin in an open conformation examined by electron tomography. *Nat Struct Biol* 5: 855-857.

110. Beck M, Forster F, Ecke M, Plitzko JM, Melchior F, et al. (2004) Nuclear pore complex structure and dynamics revealed by cryoelectron tomography. *Science* 306: 1387-1390.
